# Supplementary material for: STE20 phosphorylation of AMPK-related kinases revealed by biochemical purifications combined with genetics
Source: PubMed Central journal article supplement — J Biol Chem. 2022 Apr 10;298(5):101928. doi: 10.1016/j.jbc.2022.101928 (PMC9112000; doi:10.1016/j.jbc.2022.101928), 2022-04-10
Supplement: mmc5.pdf [file mmc5.pdf]

A

| Kinase          | Length | Alignment                   | Activation T-Loop Phosphorylation Site | Kinase Domain | Truncated Protein |
|-----------------|--------|-----------------------------|----------------------------------------|---------------|-------------------|
| SIK1            | 783    | 176-SGEPLSTWCGSPPYAAPEV-194 | T182                                   | 27-278        | 1-500             |
| SIK2            | 926    | 169-SGELLATWCGSPPYAAPEV-187 | T175                                   | 20-271        | 1-500             |
| SIK3            | 1321   | 215-PGQLLKTWCGSPPYAAPEL-233 | T221                                   | 66-317        | 59-558            |
| AMPK $\alpha$ 1 | 559    | 177-DGEFLRTSCGSPNYAAPEV-195 | T183                                   | 27-279        |                   |
| AMPK $\alpha$ 2 | 552    | 166-DGEFLRTSCGSPNYAAPEV-184 | T172                                   | 16-268        |                   |
| BRSK1           | 778    | 183-GDSLLETSCGSPHYACPEV-201 | T189                                   | 34-285        |                   |
| BRSK2           | 736    | 168-GDSLLETSCGSPHYACPEV-186 | T174                                   | 19-270        | 1-256             |
| MARK1           | 795    | 209-TGNKLDTFCGSPPYAAPEL-227 | T215                                   | 60-211        |                   |
| MARK2           | 788    | 202-TGNKLDTFCGSPPYAAPEL-220 | T208                                   | 53-304        | $\Delta$ 505-560  |
| MARK3           | 753    | 205-TGGKLDTFCGSPPYAAPEL-223 | T211                                   | 56-307        |                   |
| MARK4           | 752    | 208-LGSKLDTFCGSPPYAAPEL-226 | T214                                   | 59-310        |                   |
| NUAK1           | 661    | 205-KDKFLQTFCGSPLYASPEI-223 | T211                                   | 55-306        |                   |
| NUAK2           | 628    | 202-QGKFLQTFCGSPLYASPEI-220 | T208                                   | 53-303        |                   |
| MELK            | 651    | 161-KDYHLQTCCGSLAYAAPEL-179 | T167                                   | 11-263        |                   |
