# Supplementary material for: STE20 phosphorylation of AMPK-related kinases revealed by biochemical purifications combined with genetics
Source: PubMed Central journal article supplement — J Biol Chem. 2022 Apr 10;298(5):101928. doi: 10.1016/j.jbc.2022.101928 (PMC9112000; doi:10.1016/j.jbc.2022.101928), 2022-04-10
Supplement: mmc6.pdf [file mmc6.pdf]

| Kinase | Length | Alignment                     | Activation T-Loop Phosphorylation Site | Kinase Domain | Truncated Protein | Mutant Protein |
|--------|--------|-------------------------------|----------------------------------------|---------------|-------------------|----------------|
| MAP4K1 | 833    | 162-IGATLARRLSFIGTPYWMA-180   | S171                                   | 17-274        | 1-500             | 1-500 S171D    |
| MAP4K2 | 820    | 161-LTASVAKRRSFIGTPYWMA-179   | S170                                   | 16-273        | 1-500             | 1-500 S170D    |
| MAP4K3 | 894    | 161-ITATIAKRKSFIGTPYWMA-179   | S170                                   | 16-273        | 1-500             | 1-500 S170D    |
| MAP4K4 | 1239   | 178-LDRTVGRRNTFIGTPYWMA-196   | T187                                   | 25-289        | 1-500             | 1-500 T187E    |
| MAP4K5 | 846    | 165-ITATIAKRKSFIGTPYWMA-183   | S174                                   | 20-277        | 1-400             | 1-400 S174D    |
| MAP4K6 | 1233   | 178-QDRTVGRRNTFIGTPYWMA-196   | T187                                   | 25-289        | 1-500             | 1-500 T187E    |
| MAP4K7 | 1360   | 178-LDRTVGRRNTFIGTPYWMA-196   | T187                                   | 25-289        | 1-500             | 1-500 T187E    |
| PAK1   | 545    | 414-ITPEQSKRSTMVGTPTYWMA-432  | T423                                   | 270-521       |                   | T423E          |
| PAK2   | 524    | 393-ITPEQSKRSTMVGTPTYWMA-411  | T402                                   | 249-499       |                   | T402E          |
| PAK3   | 559    | 427-ITPEQSKRSTMVGTPTYWMA-445  | T436                                   | 283-534       |                   | T436E          |
| PAK4   | 591    | 465-VSKEVPRRKS LVGTPTYWMA-483 | S474                                   | 321-572       |                   | S474D          |
| PAK5   | 719    | 593-VSKEVPRRKS LVGTPTYWMA-611 | S602                                   | 449-700       | 200-719           | 200-719 S602   |
| PAK6   | 681    | 551-ISKDVPKRKSLVGTPTYWMA-569  | S560                                   | 407-658       |                   | S560D          |
| TAOK1  | 1001   | 172-SASMASPANSFVGTPYWMA-190   | S181                                   | 28-281        | 1-500             | 1-500 S181D    |
| TAOK2  | 898    | 172-SASIMAPANSFVGTPYWMA-190   | S181                                   | 28-281        | 1-500             | 1-500 S181D    |
| TAOK3  | 1235   | 168-SASMASPANSFVGTPYWMA-186   | S177                                   | 24-277        | 1-500             | 1-500 S177D    |
| MYO3A  | 1616   | 175-LTSTRHRRNTSVGTPFWMA-193   | T184                                   | 21-287        | 1-500             | 1-500 T184E    |
| MYO3B  | 1341   | 181-LTSTRLRNNTSVGTPFWMA-199   | T190                                   | 27-293        | 1-500             | 1-500 T190E    |
| STK2   | 1235   | 180-NTRTIQRRDSFIGTPYWMA-198   | S189                                   | 34-292        | 1-535             | 1-535 S189D    |
| STK10  | 968    | 182-NLKTQKRKDSFIGTPYWMA-200   | S191                                   | 36-294        | 1-500             | 1-500 S191D    |
| STK39  | 545    | 222-DVTRNKVRKTFVGTPCWMA-240   | T231                                   | 63-337        |                   | T231E          |
| OSR1   | 527    | 176-DITRNKVRKTFVGTPCWMA-194   | T185                                   | 17-291        |                   | T185E          |
| NRK    | 1582   | 202-VSRTNGRRNSFIGTPYWMA-220   | S211                                   | 25-313        | 1-500             | 1-500 S211D    |
| MST1   | 487    | 174-LTDTMAKRNTVIGTPFWMA-183   | T183                                   | 30-281        |                   |                |
| MST2   | 491    | 171-LTDTMAKRNTVIGTPFWMA-190   | T180                                   | 27-287        |                   |                |
| MST3   | 431    | 169-LTDTQIKRNTFVGTPTFWMA-188  | T178                                   | 36-286        |                   |                |
| MST4   | 416    | 169-LTDTQIKRNTFVGTPTFWMA-188  | T178                                   | 24-274        |                   |                |
| MST5   | 426    | 165-LTDTQIKRNTFVGTPTFWMA-184  | T174                                   | 20-270        |                   |                |
