# Supplementary figures and images for: STE20 phosphorylation of AMPK-related kinases revealed by biochemical purifications combined with genetics
Source: PubMed Central journal article supplement — J Biol Chem. 2022 Apr 10;298(5):101928. doi: 10.1016/j.jbc.2022.101928 (PMC9112000; doi:10.1016/j.jbc.2022.101928), 2022-04-10

A

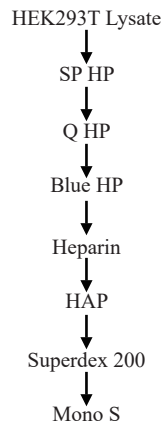

B

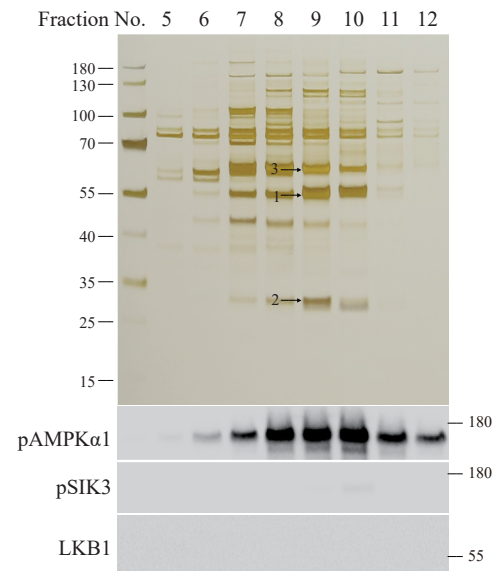

C

| Protein | Mascot score | MW    | Matched queries | Matched peptides |
|---------|--------------|-------|-----------------|------------------|
| CDK16   | 187          | 55716 | 36              | 31               |
| CAMKK1  | 166          | 55735 | 28              | 28               |
| STK38   | 137          | 54190 | 26              | 26               |
| CAMKK2  | 102          | 64746 | 20              | 20               |
| CAMK2D  | 43           | 56369 | 13              | 8                |
| PANK1   | 34           | 64399 | 13              | 11               |

D

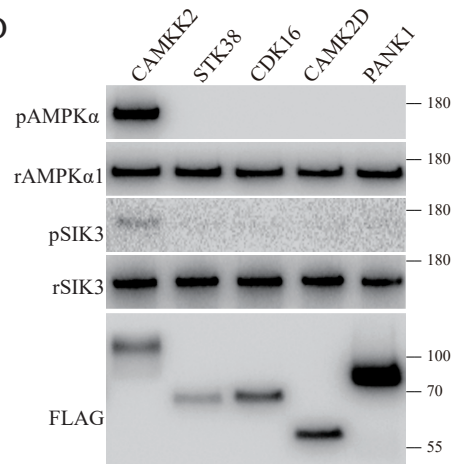

Supplement: mmc1.pdf [file mmc1.pdf]

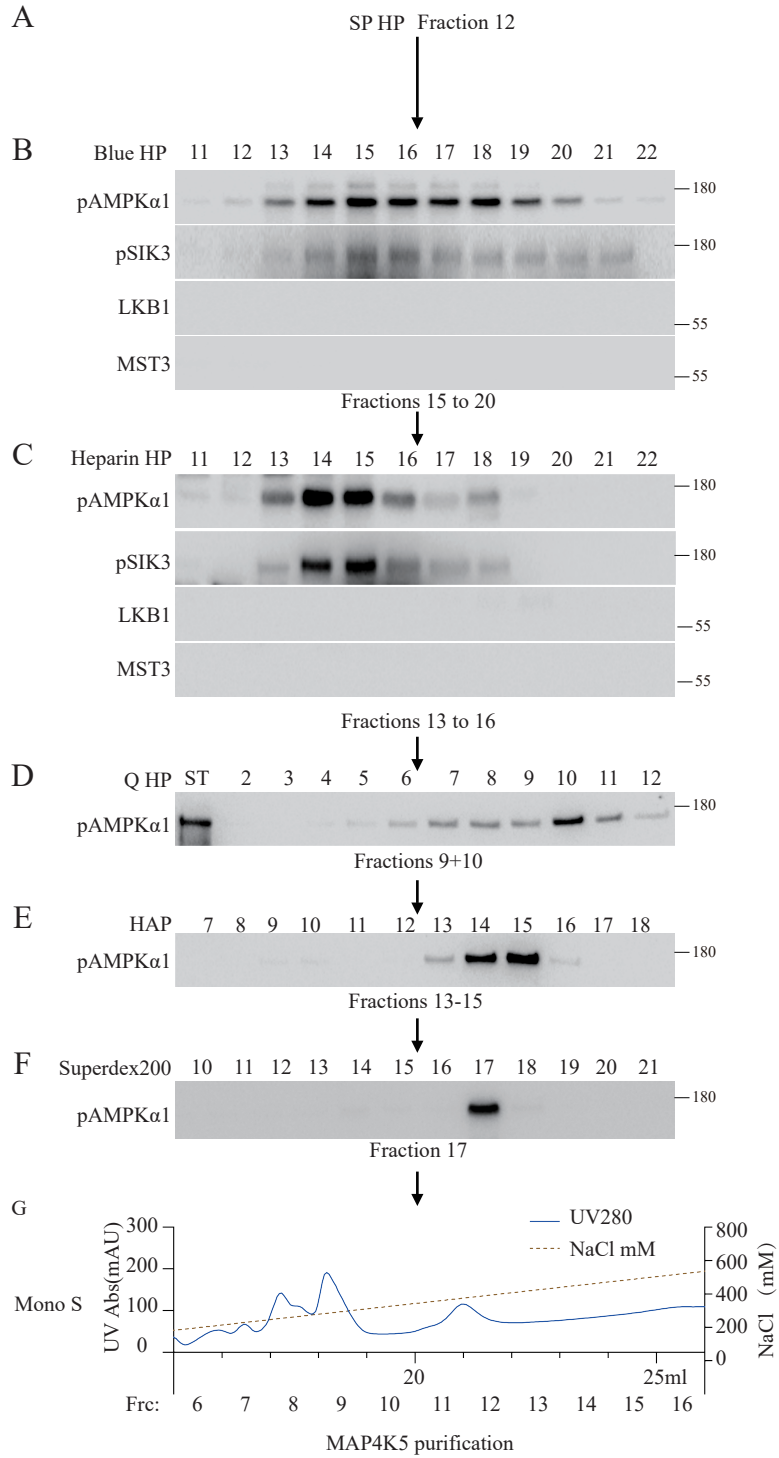

Supplement: mmc2.pdf [file mmc2.pdf]

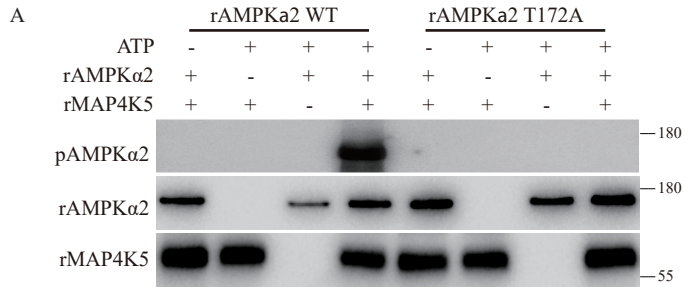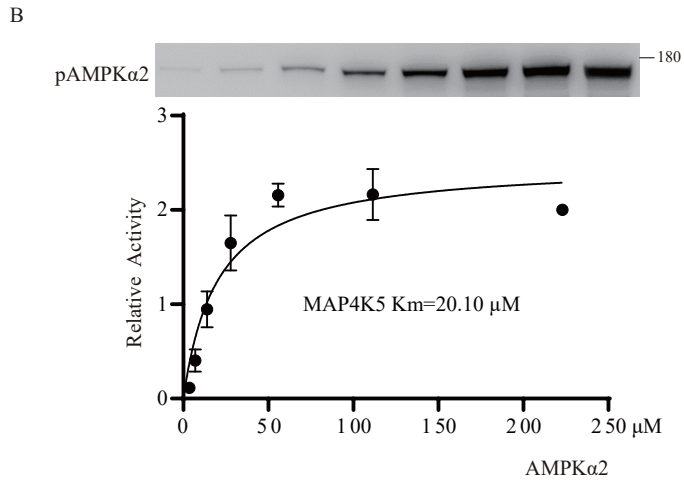

Supplement: mmc3.pdf [file mmc3.pdf]

MAP4K5 G N K D] Y] H] L] Q] t c c G S L [ A [ Y [ A [ A [ P [ E [ L [ I [ Q [ G K

RT: 36.4501 min FTMS, 959.1019@hcd30.00, z=+3, Mono m/z=958.76752 Da, MH+=2874.28800 Da, Match Tol.=0.02 Da

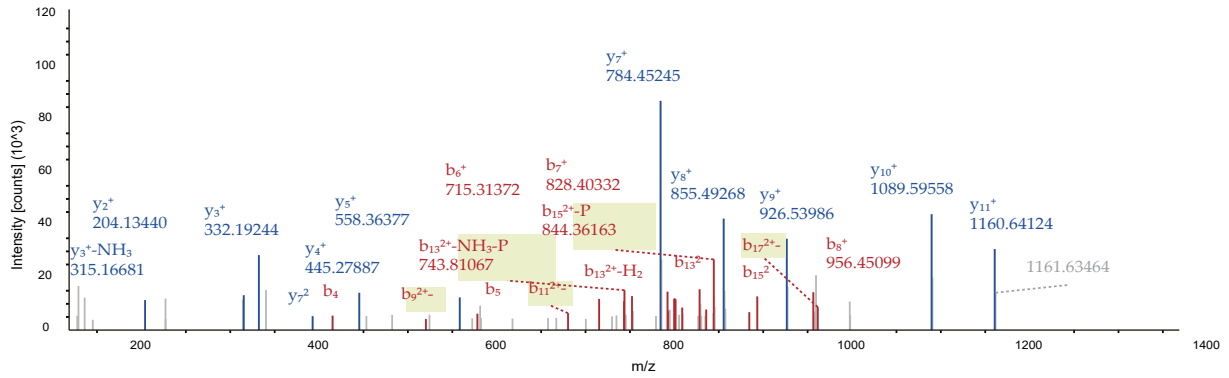

Supplement: mmc4.pdf [file mmc4.pdf]

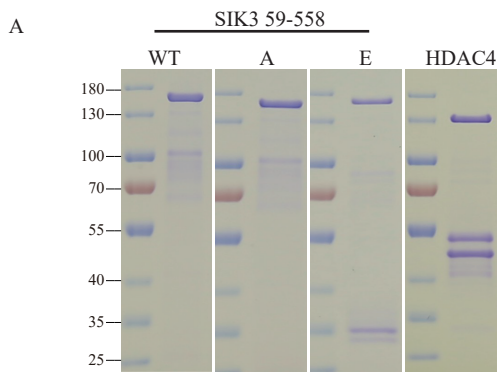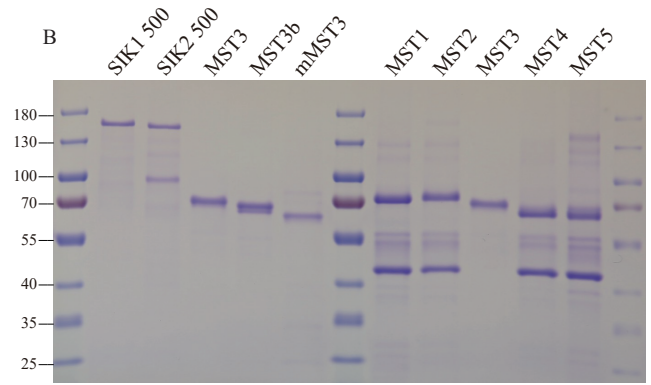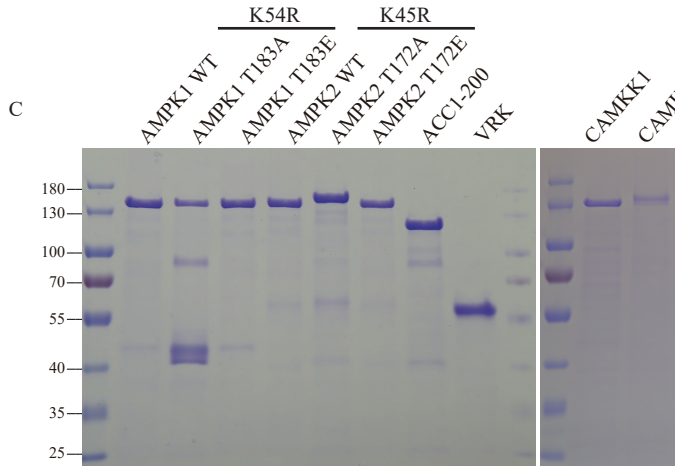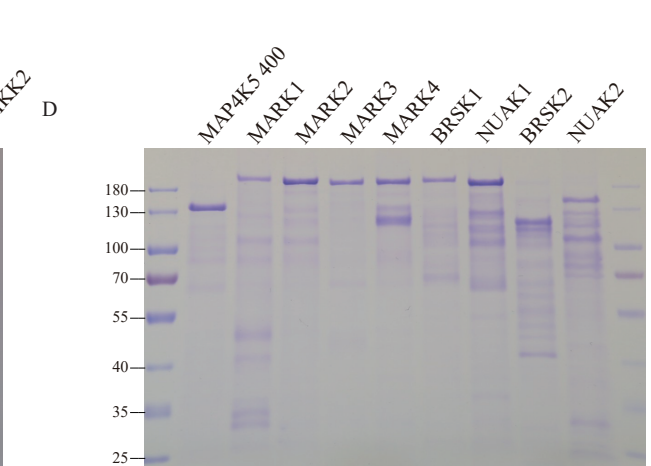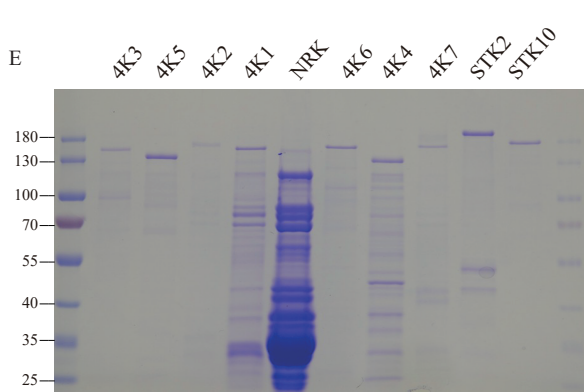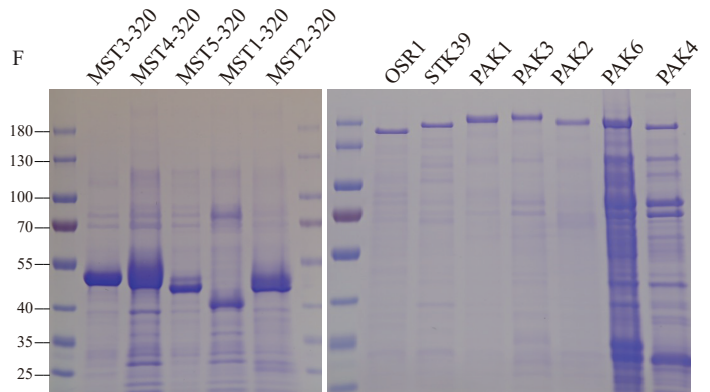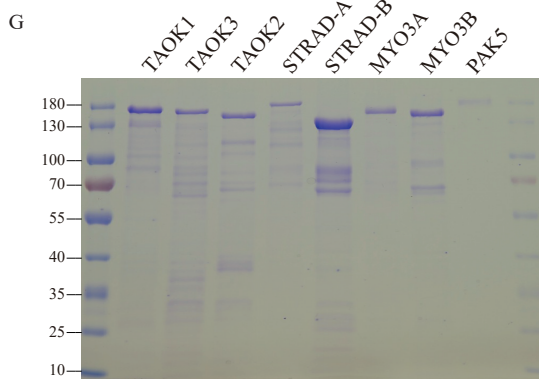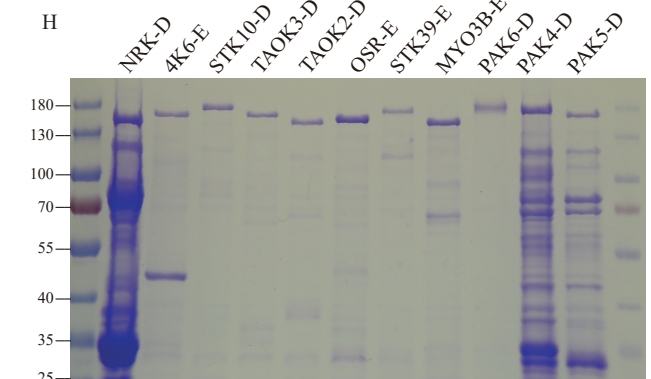

Supplement: mmc7.pdf [file mmc7.pdf]
